# Supplementary material for: The isl2a transcription factor regulates pituitary development in zebrafish
Source: PubMed Central journal article supplement (PMC9941339; doi:10.3389/fendo.2023.920548), 2023-02-07

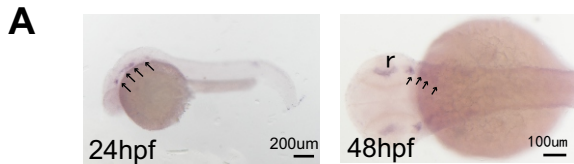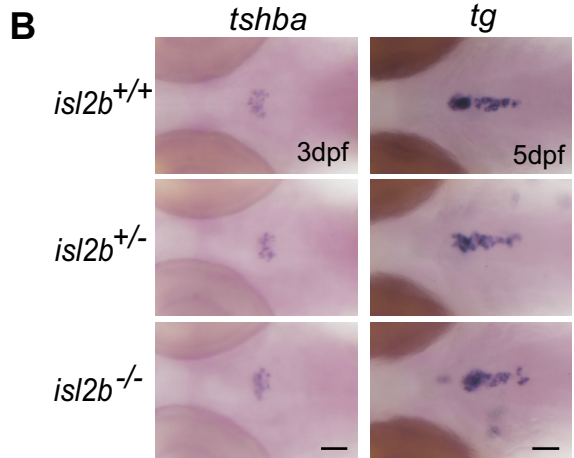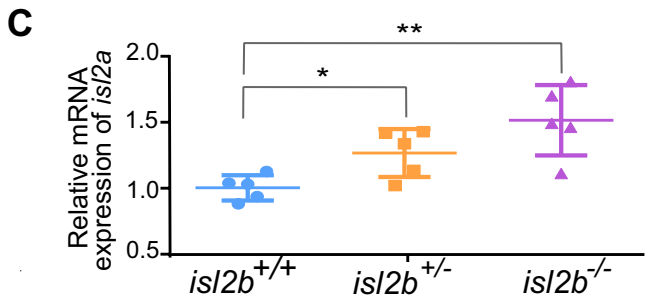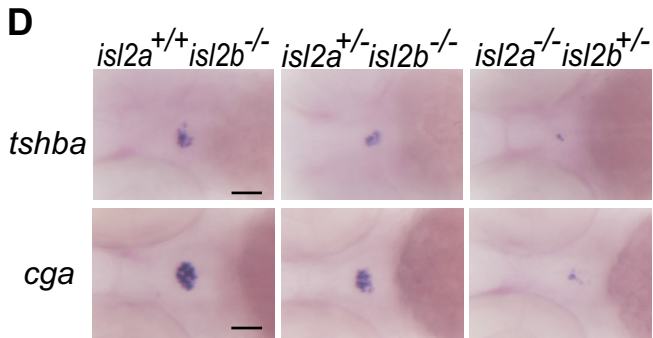

Supplement: Image_1.pdf [file Image_1.pdf]
